# Supplementary material for: Direct Effects of D-Chiro-Inositol on Insulin Signaling and Glucagon Secretion of Pancreatic Alpha Cells
Source: MDPI journal article supplement (doi:10.3390/biom10101404), 2020-10-04
Supplement: s1 [file s1]

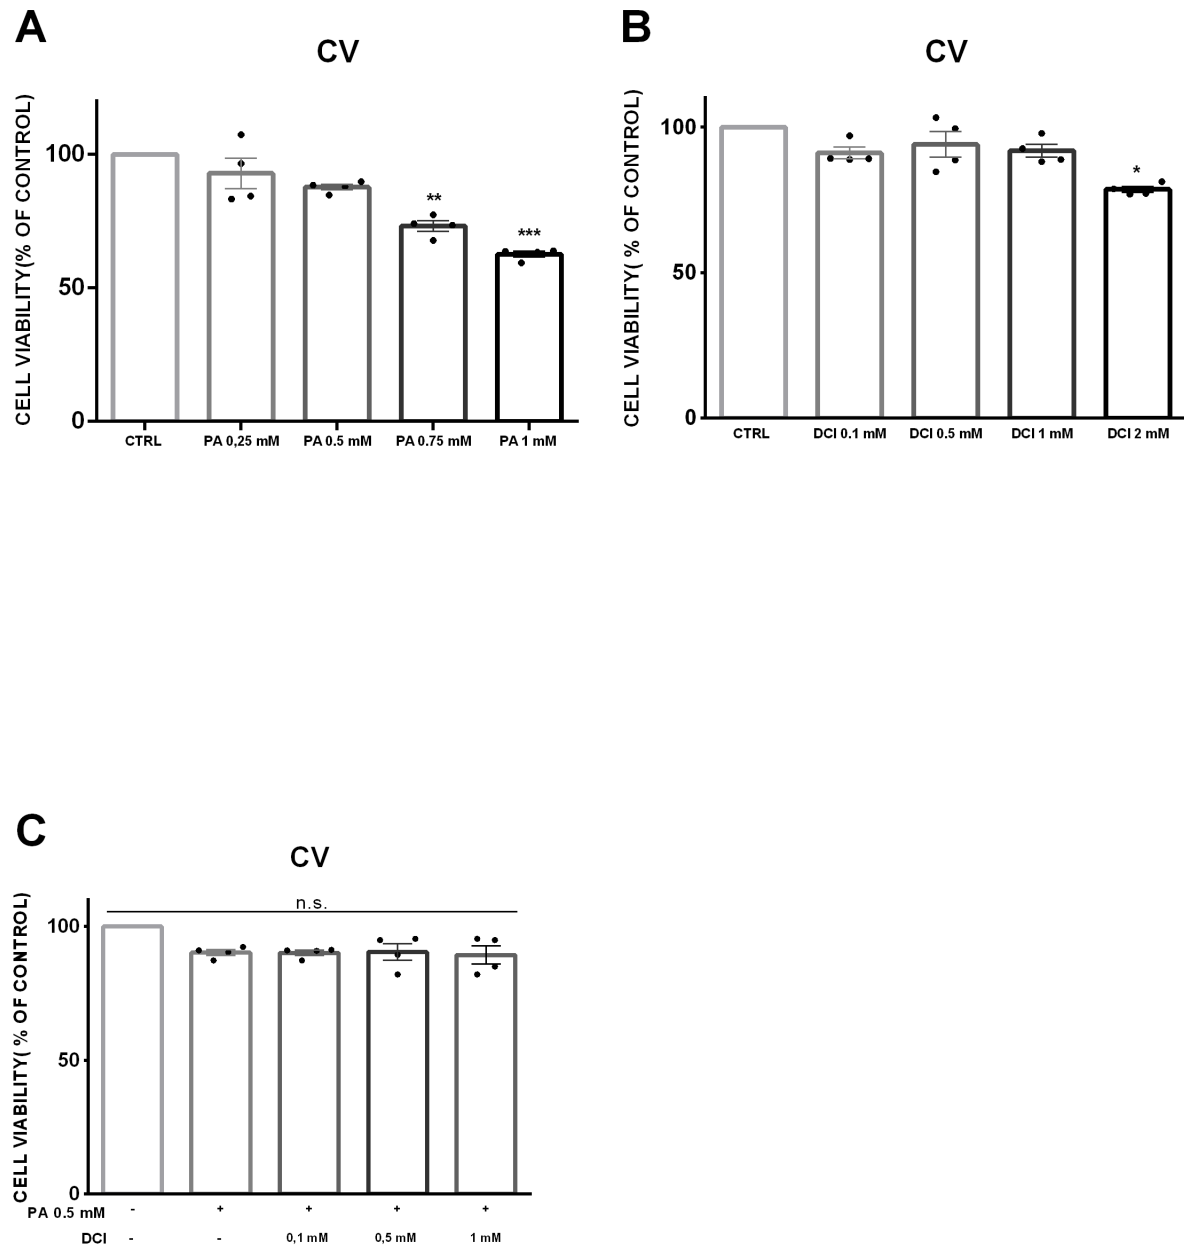

**Figure S1.** Effect of palmitate and DCI exposure on cell viability in  $\alpha$ -TC1-6 cells.

Crystal violet assay in  $\alpha$ -TC1-6 cells exposed to increasing concentrations of palmitate or DCI. **(A)**  $\alpha$ -TC1-6 cells exposed to palmitate (0.25 mM, 0.5 mM, 0.75 mM and 1 mM) for 48 h. **(B)**  $\alpha$ -TC1-6 cells exposed to DCI (0.1 mM, 0.5 mM, 1 mM and 2 mM) for 48 h. **(C)**  $\alpha$ -TC1-6 cells exposed to DCI (0.1 mM, 0.5 mM and 1 mM) in the presence of palmitate (0.5 mM) for 48 h. Data are expressed as scatter plots with bar  $\pm$  standard error of 570 nM absorbance to % of control. Experiments were conducted in four biological replicates. One-way ANOVA test: \* $p < 0.05$ , \*\* $p < 0.001$ , \*\*\* $p < 0.0001$  with respect to controls. n.s., not significant; PA, palmitate; DCI, D-chiro-inositol; CV, Crystal Violet.

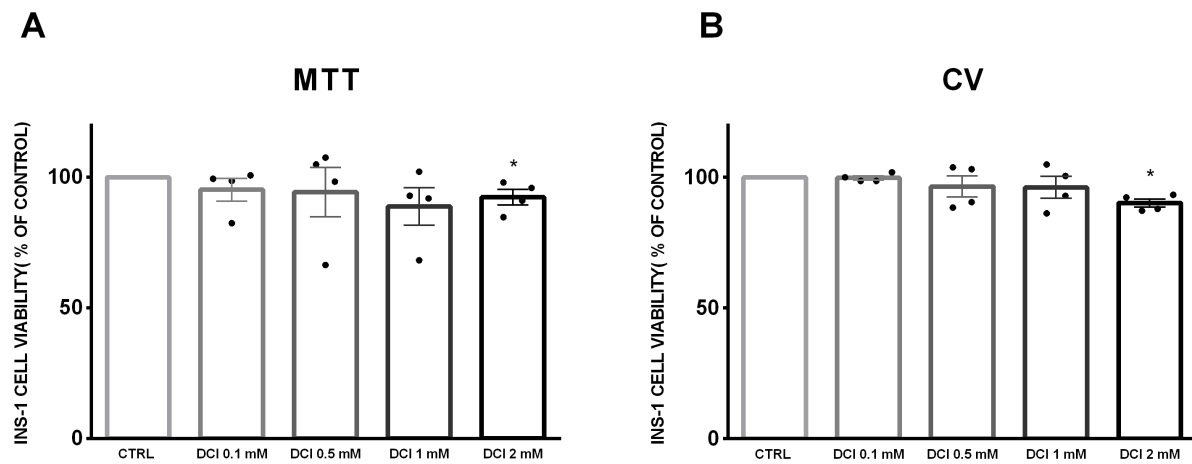

**Figure S2.** Effect of DCI exposure on cell viability in INS-1 cells.

MTT assay (**A**) and crystal violet assay (**B**) in INS-1 cells exposed to increasing concentrations of DCI (0.1 mM, 0.5 mM, 1 mM and 2 mM) for 48 h. Data are expressed as scatter plots with bar  $\pm$  standard error of 570 nM absorbance to % of control. Experiments were conducted in four biological replicates. One-way ANOVA test: \*  $p < 0.05$  with respect to controls. PA, palmitate; DCI, D-chiro-inositol; CV, Crystal Violet.
